# Supplementary material
Source: publisher figshare collection journal article supplement (https://gsapubs.figshare.com/ndownloader/files/26669588)
Supplement: Supplementary file 1 [file 26669588]

## Sheet: Stats_geometry
Supplementary Data 7. Anova and Tukey post hoc tests of the geometry of untreated and matured melanosomes. Bold text represents statistically significant p-values
ANOVA		lenght	width	aspect ratio
skin		5.92 e-08 (F=17.28)	0.0004 (F=7.9)	0.17 (F=1.7)
liver		1.49 e-15 (F=35.48)	4.07 e-12 (F=27.01)	0.009 (F=4.73)
TUKEY		lenght	width	aspect ratio
	untreated-copper	1 e-7	3e-05	0.16
liver	water-copper	1 e-7	1 e-7	0.43
	water-untreated	0.91	0.013	0.007
	untreated-copper	1 e-7	0.002	–
skin	water-copper	0.0008	0.13	–
	water-untreated	0.07	0.09	–
T-test on the geometry of melanosomes for specific pairs of tissues treated under the same experimental conditions.
	lenght	width	aspect ratio
untreated skin-liver	0.03	1.01 e-05	0.02
copper skin-liver	0.29	0.001	0.005
water skin-liver	2.38 e-11	2.07 e-31	1.20 e-07

## Sheet: G48696
Rossi, V., Webb, S.M., and McNamara, M., 2021, Maturation experiments reveal bias in the chemistry of fossil melanosomes: Geology, v. 49, https://doi.org/10.1130/G48696.1
